# Supplementary material for: Dynamical Downscaling of Daily Extreme Temperatures over China Using PRECIS Model
Source: MDPI journal article supplement (doi:10.3390/su16073030), 2024-04-05
Supplement: s1 [file s1]

Archive with 1 entries (1 files):
- sustainability-2934118-supplementary.pdf
